# Supplementary material for: Eosinophils Enhance Granuloma-Mediated Control of Persistent Salmonella Infection
Source: Research Square preprint supplement (doi:10.21203/rs.3.rs-5610725/v1), 2025-01-03
Supplement: Supplementary file 1 [file 43177713d717fd374ce2aa2f.xlsx]

## Sheet: Sheet 1 - BJ9FDU_mMulti_94g_gen
Gene	Ensembl ID	Probesets
Itgam	ENSMUSG00000030786	8
Cd14	ENSMUSG00000051439	8
Ly6c2	ENSMUSG00000022584	8
Cd19	ENSMUSG00000030724	8
Marco	ENSMUSG00000026390	8
Cd68	ENSMUSG00000018774	8
Itgax	ENSMUSG00000030789	8
H2-Aa	ENSMUSG00000036594	6
H2-M2	ENSMUSG00000016283	8
Cd3e	ENSMUSG00000032093	8
Cd4	ENSMUSG00000023274	8
Cd8b1	ENSMUSG00000053044	8
Cd209a	ENSMUSG00000031494	8
Xcr1	ENSMUSG00000060509	8
Prg2	ENSMUSG00000027073	8
Epx	ENSMUSG00000052234	8
Cxcr3	ENSMUSG00000050232	8
Ccr6	ENSMUSG00000040899	8
Ccr4	ENSMUSG00000047898	8
Ccr3	ENSMUSG00000035448	8
Il1rl1	ENSMUSG00000026069	8
Cx3cr1	ENSMUSG00000052336	8
Ccl24	ENSMUSG00000004814	8
Gpr183	ENSMUSG00000051212	8
Mpo	ENSMUSG00000009350	8
Ccl9	ENSMUSG00000019122	8
Il5	ENSMUSG00000036117	8
Il33	ENSMUSG00000024810	8
Socs3	ENSMUSG00000053113	8
Il13	ENSMUSG00000020383	8
Ifnb1	ENSMUSG00000048806	8
Cx3cl1	ENSMUSG00000031778	8
Stat1	ENSMUSG00000026104	8
Stat3	ENSMUSG00000004040	8
Stat4	ENSMUSG00000062939	8
Stat6	ENSMUSG00000002147	8
Pparg	ENSMUSG00000000440	8
Irf3	ENSMUSG00000003184	8
Irf4	ENSMUSG00000021356	8
Irf7	ENSMUSG00000025498	8
Irf8	ENSMUSG00000041515	8
Rorc	ENSMUSG00000028150	8
Tbx21	ENSMUSG00000001444	8
Gata3	ENSMUSG00000015619	8
Foxp3	ENSMUSG00000039521	8
Retnla	ENSMUSG00000061100	8
Cdh1	ENSMUSG00000000303	8
Epcam	ENSMUSG00000045394	8
Tlr2	ENSMUSG00000027995	8
Tlr4	ENSMUSG00000039005	8
Tlr5	ENSMUSG00000079164	8
Tlr9	ENSMUSG00000045322	8
Gzmb	ENSMUSG00000015437	8
Lcn2	ENSMUSG00000026822	4
Prf1	ENSMUSG00000037202	8
Ace	ENSMUSG00000020681	8
Lamp1	ENSMUSG00000031447	8
Lamp2	ENSMUSG00000016534	8
Egr1	ENSMUSG00000038418	8
Egr2	ENSMUSG00000037868	8
Cd63	ENSMUSG00000025351	8
Mrc1	ENSMUSG00000026712	8
Cd80	ENSMUSG00000075122	8
Cd86	ENSMUSG00000022901	8
Clec10a	ENSMUSG00000000318	8
Arg1	ENSMUSG00000019987	8
Nos2	ENSMUSG00000020826	8
Fcgr1	ENSMUSG00000015947	8
Il7r	ENSMUSG00000003882	8
Cd69	ENSMUSG00000030156	8
Cd8a	ENSMUSG00000053977	8
Cd274	ENSMUSG00000016496	8
Il4ra	ENSMUSG00000030748	8
Cd24a	ENSMUSG00000047139	8
Tnf	ENSMUSG00000024401	8
Il6	ENSMUSG00000025746	8
Il12b	ENSMUSG00000004296	8
Il10	ENSMUSG00000016529	8
Il1b	ENSMUSG00000027398	8
C1qa	ENSMUSG00000036887	8
Cxcl10	ENSMUSG00000034855	8
Cxcl16	ENSMUSG00000018920	8
Cxcl9	ENSMUSG00000029417	8
Cxcl2	ENSMUSG00000058427	8
Ifng	ENSMUSG00000055170	8
Il17a	ENSMUSG00000025929	8
Mmp3	ENSMUSG00000043613	8
Il4	ENSMUSG00000000869	8
Il1rn	ENSMUSG00000026981	8
Ccl3	ENSMUSG00000000982	8
Ccl11	ENSMUSG00000020676	8
Trem2	ENSMUSG00000023992	8
Tnfsf13	ENSMUSG00000089669	8
Ifngr1	ENSMUSG00000020009	8
