# Supplementary material for: Eosinophils Enhance Granuloma-Mediated Control of Persistent Salmonella Infection
Source: Research Square preprint supplement (doi:10.21203/rs.3.rs-5610725/v1), 2025-01-03
Supplement: Supplementary file 2 [file 9e88d62517b4d39d478ecc0e.docx]

**Supplementary table 1**

| **REAGENT OR RESOURCE** | **SOURCE** | **IDENTIFIER** |
| --- | --- | --- |
| **Antibodies** | | |
| Chicken anti-*Salmonella* | Aves Lab | Custom-made |
| CD11b Brilliant Violet™ 650 | Biolegend | Cat# 101239  BRID: AB_11125575 |
| CD11b Alexa Fluor® 594 | Biolegend | Cat# 101254  BRID: AB_2563231 |
| CD11C PE-CY7 |  | Cat# 117317  BRID: AB_493568 |
| CD64 PE | Biolegend | Cat# 139304; RRID: [AB_10612740](https://antibodyregistry.org/AB_10612740) |
| CD24 Brilliant Violet™ 510 | Biolegend | Cat# 101831  BRID: AB_2563894 |
| Ly6G BUV395 | BD Horizon | Cat# 565964  BRID: AB_2716852 |
| Siglec-F PE | BD Horizon | Cat# 562068  BRID: AB_394341 |
| Siglec-F Alexa Fluor® 647 | BD Horizon | Cat# 562680  BRID: AB_2687570 |
| CD63 PE/Dazzle 594 | Biolegend | Cat# 143913  BRID: AB_2565503 |
| PD-L1 Brilliant Violet™ 605 | Biolegend | Cat# 124321 |
| PD-L1 Biotin |  | Cat# 124305 |
| CD80 Brilliant Violet™ 421 | Biolegend | Cat# 104725  BRID: AB_2561445 |
| Ly6C Brilliant Violet™ 711 | Biolegend | Cat# 128037  BRID: AB_2562630 |
| iNOS eFluor450™ | eBioscience™ | Cat# 48-5920-82  BRID: AB_2802293 |
| MHC-II BUV805 | Biolegend | Cat# 562680  BRID: AB_2687570 |
| MHC-II Alexa Fluor® 700 | Biolegend | Cat# 107621  BRID: AB_493727 |
| CD14 FITC | Biolegend | Cat# 123307  BRID:  AB_940578 |
| CD301 PerCP CY5.5 | Biolegend | Cat# 145709  BRID: AB_2564578 |
| CXCL9 eFluor660™ | eBioscience™ | Cat# 50-3009-80  BRID: AB_11218694 |
| CD4 Brilliant Violet™ 421 | Biolegend | Cat# 100443  BRID: AB_10900241 |
| CD19 BUV395 | BD Horizon | Cat# 563557  BRID: AB_2722495 |
| CD8a Alexa Fluor® 700 | Biolegend | Cat# 155021  BRID: AB_2890707 |
| Foxp3 APC | eBioscience™ | Cat# 17-5773-82  BRID: AB_469457 |
| Tbet FITC | Biolegend | Cat# 644811  BRID: AB_2287097 |
| GATA3 PerCP CY5.5 | Biolegend | Cat# 386909  BRID: AB_3097430 |
| Mouse anti-EPX | Provided by Elizabeth Jacobsen, Mayo Clinic | N/A |
| Goat anti-mouse Alexa Fluor® 488 |  | Cat# 562680  BRID: AB_2687570 |
| Goat anti-chicken Alexa Fluor® 594 |  | Cat# 562680  BRID: AB_2687570 |
| Strepdavidin anti-Biotin |  |  |
| Rat anti-Siglec-F | R&D Systems | Cat# MAB17061 |
| Rat IgG2A, κ Isotype | R&D Systems | Cat# MAB006 |
| Ultra-LEAF™ Purified anti-CCL11 Antibody | Biolegend | Cat# 683203 BRID: AB_2571917 |
| Ultra-LEAF Purified Rat IgG1, κ Isotype | Biolegend | Cat# 400458 |
| **Bacterial and virus strains** | | |
| *Salmonella enterica* serovar Typhimurium, strain SL1344, StrepR | Monack lab strain collection | N/A |
| *Salmonella enterica: serovar Typhimurium: strain SL1344::phoN-dTomato* | Monack lab strain collection, Originally from Goldberg *et al*.9 | N/A |
| Chemicals, peptides, and recombinant proteins | | |
| Recombinant murine IL-5 | PreProTech | Cat# 215-15 |
| ACK lysis buffer | Lonza | Cat# BW10-548E |
| DNase I | Sigma | Cat# 101041590001 |
| Liberase TL | Sigma | Cat# 054010200001 |
| Live/Dead Fixable Viability Dye | In vitrogen | Cat# L-34962 |
| TruStain fcX | Biolegend | Cat# 101320 |
| **Critical commercial assays** |  |  |
| Custom Xenium *in situ* Panel | 10X Genomics | N/A |
| CCL11 duoset ELISA | R&D Systems | DY420-05 |
| **Experimental models: Organisms/strains** |  |  |
| 129x1/SvJ mice | Jackson Laboratory | Stock# 000691 |
| C57BL/6J mice | Jackson Laboratory | Stock# 000664 |
| B6.129S1(C)-*Gata1tm6Sho*/LvtzJ (C57BL/6dblGATA1) mice | Jackson Laboratory | Stock# 033551 |
| 129DdblGATA1 | In-house | This study |
| **Software and algorithms** |  |  |
| FlowJo | FlowJo LLC | [https://www.flowjo.com](https://www.flowjo.com/) |
| Prism | GraphPad Software Inc. | <https://www.graphpad.com/scientific-software/prism/> |
| RStudio | RStudio IDE | https://posit.co/download/rstudio-desktop/ |
| Xenium explorer | 10X genomics | https://www.10xgenomics.com/support/software/xenium-explorer/latest |
